# Supplementary material for: Histone Abundance Quantification via Flow Cytometry of Htb2-GFP Allows Easy Monitoring of Cell Cycle Perturbations in Living Yeast Cells, Comparable to Standard DNA Staining
Source: MDPI journal article supplement (doi:10.3390/jof9101033), 2023-10-20
Supplement: s1 [file s1]

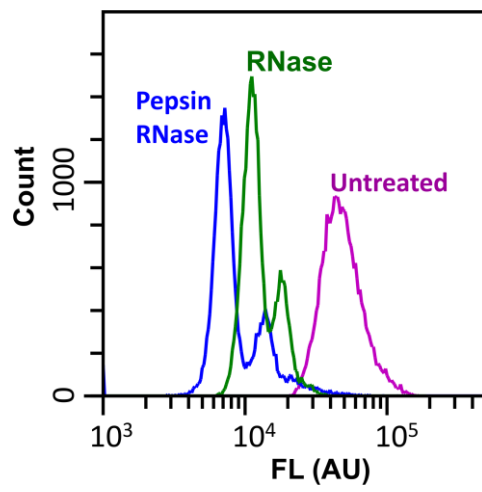

**Figure S1.** Pepsin treatment is not required either for efficient RNase treatment nor for PI staining. The *O. polymorpha* exponentially grown cells we subjected to the fixation-PI staining procedure described in Materials and Methods, which includes RNase treatment (RNase), or the procedure omitting the RNase treatment step (No treatment), or the procedure with additional pepsin treatment step prior to the RNase treatment (Pepsin RNase).

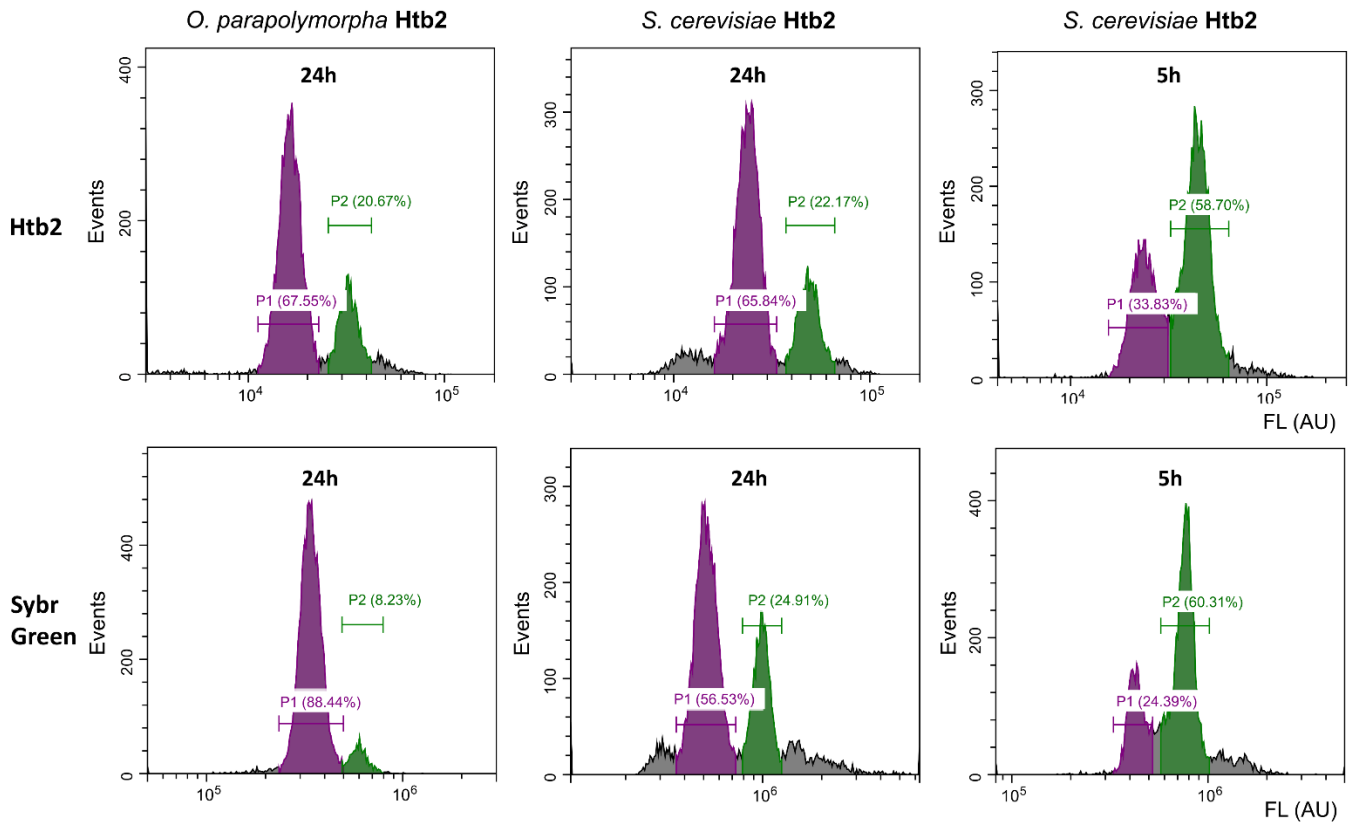

**Figure S2.** Gates for measuring the 1c and 2c

**Map and sequence of the pKAM984 plasmid, scheme of its genome integration and positions of primers 610L1 (GACGGCTAAAGCGAGTGG), SL3 (GGTGTATGCTGTCGCCGAAGAAG), AU (GGTGGAAATGAGCAGAGAGG), and AL (GGATCGTGAACAGCTTAGTGG), used for the PCR analysis of the integration locus.**

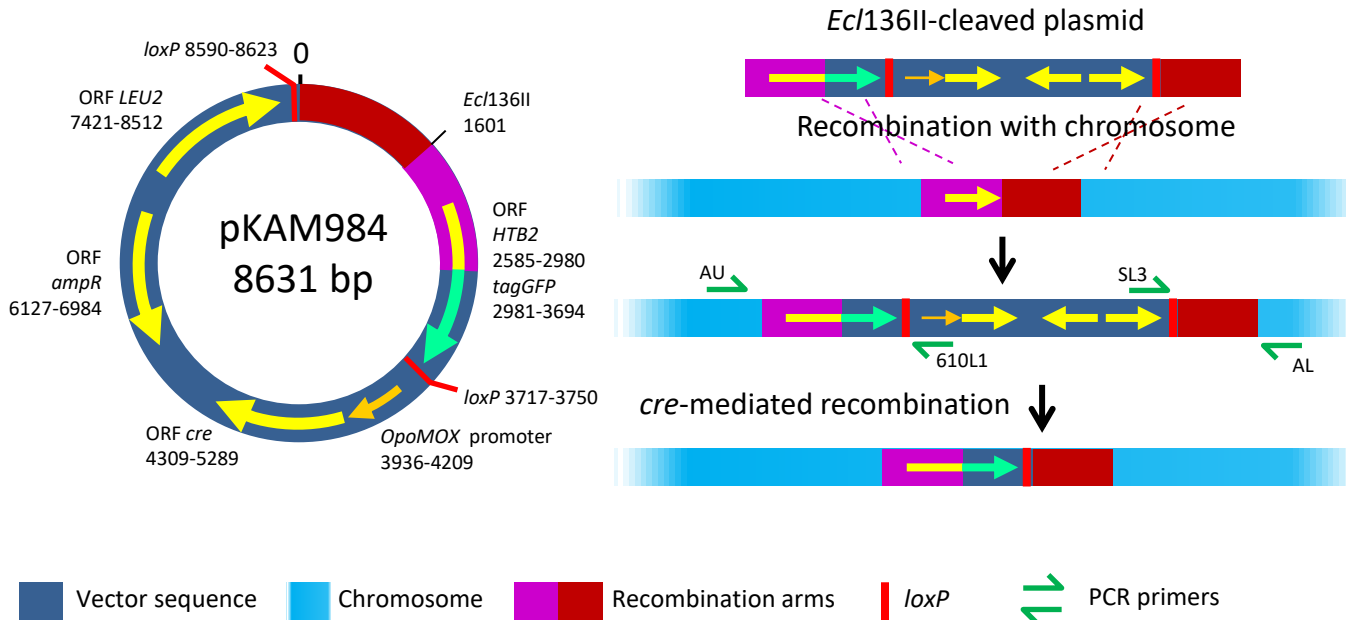[illegible]

# Map and sequence of the pKAM930 plasmid.

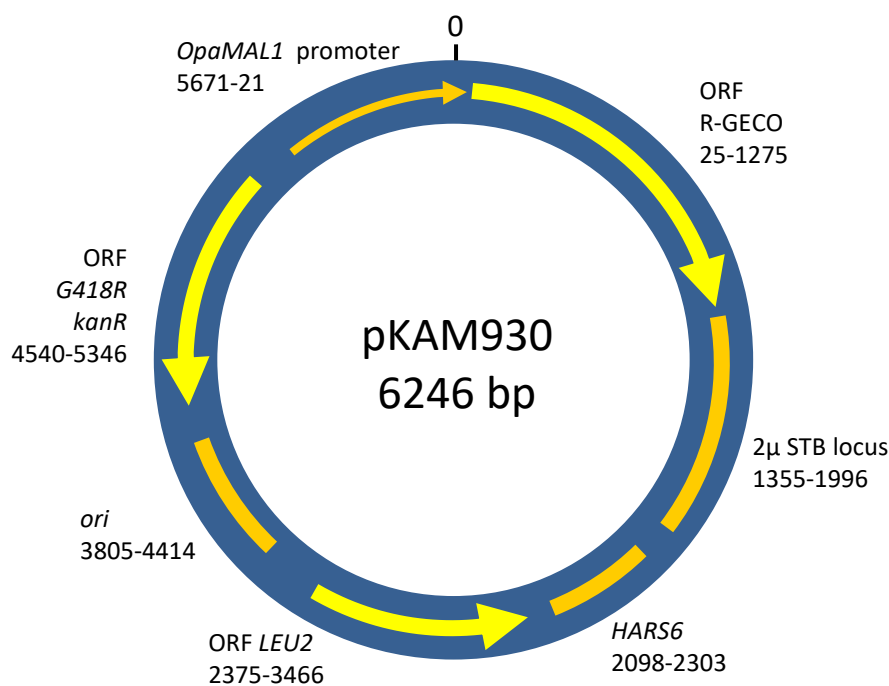

atccctcttgacaataattatccatggtgactcgtcgagaagaagtggaacaaggctggacacgctgtgagagccatgggaagactcgtctccagttgtgtctgagagaatgtaccagaggacggagcactgaagtc  
ggagatcaagaaggagactgaagcagggagctactatgctgctgaggtgaagaccactacaagccaagaagcagtgcaactgccaggagcctacatcgttgacatcaagctggacatcgtgtctcacaacg  
aggactacacatcgttgagcagtgtagagagcgaagaagacactcagctggaggatggagcaactcacaagggtggactggaggttctctggtgtcacaaggagaggaagaacaatggcaatcatcaagga  
gttcacgcttcaaggttcacatggaaggtcgtgtaacggacacgagttcagatcgaaggtgagggtagaggtacacatcgaagccttcagactgccaagctgaaggtgaccaaaaggtggaccattccgtttgctt  
gggacatcctgtctccacagttcatgtacggatcgaaagcctacatcaagcatccagcagacatccagactctcaagctgctgttccagaaggcttcagatgggagagagtgatgaacttcgaggatggaggcatcatc  
catgtcaaccaagactcgtctccaggatggagtggtcatcacaagggtgaagctgagaggaaaccaactccctccagatggaccagtgatgcagaagaagcagtgaggatgggaagctaccagagaccaactcactgag  
gaacagattgctgagttcaaggaagccttctgctgttcgacaaggatggtgatggaacatcactaccaaggagcttggaaactgtgatgagatcgttggacagaatccgactgaagcagaactccaggacatgatcaacg  
agggtgatgctgagatggaaccttcgacttctgagttcctgacatgatggcaagaagatgaacgacactcgtgaggaagagatcagagaagccttcagagtggttcgacaaggatggcaatggctacatcgg  
agctgctgaactgagacacgttatgacgaccttggtgagaagctgactgacgaagaggtggatgagatgatcagagttgctgacatcgacggagatggctaggtgaactcagaggagttcgtgagatgatgactgccaag  
taatggatccgaattcagctcgggtaccggggatccaagcttcagctggcgccgcatagggccactagtggtgatgataacgaagcactcgtctcattttgagaacaaaaatcaacgcgagagcgctaatttttcaaac  
aaagaatcgtgagctgcatttttacagaacagaatgcaacgcgaagcgctattttacaacgaagaatcgtgcttattttgtaaaaaaatacaacgcgagagcgctaatttttcaacaaagaatcgtgagctgcatt  
ttacagaacagaatgcaacgcgagagcgctattttacaacaaagaatctatacttttttcttcaaaaaatgcatccgagagcgctattttcaacaaagcactctagattactttttctcttctgctgcctataaa  
tgacgtctctgataacttttgcactgtaggctcgttaagggttagaagaaggctactttgtgtctattttcttccataaaaaagcgtgactccacttcccgctttactgattactagcgaagctcgggtgcatttttcaag  
ataaaggcatccccgattatctataccgatgtggatgctgacatctttgtaacagaagtgatagctgtgatcttcttggtagaaaattatgaacggttcttctatgttctctataactaccgataccgtcgatc  
ttgcgatttaacagctcagatcgttaaacagcttggccacgaagcttcttatttggtagactttctgtaggtgaggaacccatagggatagcgaataatcgaaggttaatactagcagttgcattgagcttgatattat  
agaagggaattgtgctgattactaatgtcccggtcatatgttgtagcttttcagagccagaatggtgtgctgcgaccttcaaaaaattaccacaattataaaaaaactcaaaaaataaaaaatagcatcaaacacgcgacc  
ggttaactacaaaactaagatcgacctgagggggggccgggtacaaatatcataaaaaagagaatcttttaagcaaggatttttcaacttctcggcgacagcatcaccgactcgggtgactgttggaaacaccta  
atcaccagttctgatactgcatacaaaccttttaactgcatctcaatggccttacttctcaggcaggttcaatgacaatttcaacatcattgcagcagacaagatagtgcgcataggggtgacatttatttctggcaaatct  
ggagcagaacgttgcatggttctgtaacaaatgctggttctgtcggcaagagccaaaggacgcagatggcaacaaacccaaggaaactgggataacggaggttcatcgagatgatgtaccaacatattg  
ctggtgatgataaactatttaggtgggttgggttcttaactaggatcatggcgagagaatcaatcaattgatgtgaaccttcaatgtaggaaattcctgattcgaaggttaatactagcagttgcatgagcgccctgtgtg  
aaacattagcttttcaaggacaaataggcaatggtggtcatgttgtagggcatgaaagcgccacttctgtatttctgacttctggaacggtgtattgttactactccaacgcacacatcaccatcgtcttcttct  
cttacaagaataaactctccactaattctctgacaacaagaatcagtagctttagcaaatgtggtcttattggagataagtctaaaagagagtcggatgcaaaagtacatggtcttaagtggcgtaaatgaagtct  
ttacgatttttagtaaacctgttcagggttaacatcactgttaccctatttaggacacccacagcactaacaacacggcatcaacttctggaggttccagcgctcactggaagtggaacactgtgacatcagatg  
cagcaccaccaataatgattttcgaatgaactgacattggaacgaacatcagaataagcttaagaaccttaaggtcttgcgtgtgatttctgaccaacgtggtcacttggcaaaacgacgatcttcttagggcgag  
acattagaatggtatatacttgaatatataatattctgaaatgtaactcagttgtaaaaggatgatatcgtcaggcgacactctgaaatacaaaaaaattccagtcacgaatttattctgtgcatagcgccctgtgtg  
ttctgttattgtgagaaaaaataatggttctgaagagatcgaaactctgcatctacgatacctgagatttccacagtaattcttgaagcgaagggtcctgtagacgctattttataggttaagtctatgtgagca  
aaaggccagcaaaaggccaggaacgttaaaaggcgctgttggcgttttccataggtctcggccctcagcagcatcacaacacgacgtcaagtcagaggttggcgaacccgacaggaactataaagatacca  
ggcgtttcccttgaagctcctcgtgctcctgttccgacctcggccttaccggataactgtcgccttctccttgggaagcgtggtcgttctcatagtcacgctgtaggtatctcagttcgggtgtaggtcgttgcctc  
caagctgggtgtgtgcagcaacccccgttcagccgacgctgctgcttaccggttaactatcgttctgagtcacacccggtgaagacagcacttatcgccactggcagcagcactggaacaggaattagcagagcgaggt  
atgtagcggtgtcacagagttcttgaagtgggtggtcctaactacagctacactagaagaacagatttggtagcttgcgtcgtcgtgacacatagcttctgacagacttccctggaacaaagagttggtagcttctgaacggcaacaaacaccg  
ctgtagcggtggttttttgttgaagcagcagattacgcgcagaaaaaaggatctcaagaagatctttagtcttctcaggggtctgacgtcagtggaacgaaacacgtaagggtatttggctatgagctgtgcg  
cgtccgtcaagtcagctgaatgctcgtcggatgttacaaccaataaactctgattagaaaaactcagcagcatcaaatgaaactgcaatttattcatatcaggattatcaatacatattttgaaaaagcgtttctgt  
aatgaaggagaaaactcaccgagcagttccataggtggcaagatcctggtatcgttgcgttccgactcgtcacaatcaatacaactattaatttccctcgtcaaaaaaagggttatcaagtgagaatcaccatg  
agtgaagactgaatccggtgagaatggcaaaagtgtgatttcttcagacttgaacagggcagcattacgctgtcatcaaaactcactgcatacaacaaacggtatttattctgtgattgctgcctgagcgagacga  
aatacgcgactcgtttaaaggacaattacaacaggaaatcgatgcaacggcgaggaacactgtgacagattacgcaatgatagcttctgacagactcctcgttaccagacactcgttaccacttacaataaattgagagctgtgc  
agtggtgagtaacatgcatcatcaggagtagcgaataaattctgtatggtcggaagagcgaataattcgtcagccagtttagtctgacatctcatctgtaacatcattggcaacgctaccttgcattgttcagaacaaac  
tctggcgatcgggttccatacaagcagatagttgtgcacgtgattcccgacattatcgagccattatcccatataaatcagcatcattgttgaatttaacgcgccctgacgttccgttgaataggtctcata  
acacctatattatttctgactaaagagcaattgataatgtgcgagaaaaactggtccttatatacgttggcagcactcctccgaactttagcaaaaagctggtcgcacactgatttcatcagcgaacacacacgctat  
gactactcgggctgcttctgtgtgaattgttaccgctcacaattccacacaatacagcgcggaagcataaagtgtaaagcctgggtgcttaattagtgagtaactacattaattcggttgcctcactgcccc  
ctttcagctcggaacactcgtcgtcagatcttccgggagatcgcaatagaagaagcagggcactgtgcagattacgcgacatgatagcttctgattgttctacagactcctcgttaccacttacaataaattgagagctgtgc  
cgtcgtatgaacacttgggttatacaagtttctaagaccccttgacgttgattgctggttccctcagggctctatgtgttcaagtactcgcagtggtgtagcaagcgtgggggtcaattacgtcacttctattcatgta  
ccccagactcaatttggcagttatttcagcgagaataaattgtgcaataaattcgtcctcaataaattagccgtgatttaatactcgtgaacaggaactcgtctgggtacagataaatacaataaactattatggac  
gtgcatagggaggtggagccatgacgcaacggaaatctcttttatttccggaagtttagggagatacaaacgctgcgctcgtcaaatgtagagaatgctttagtaagctcaagccatataaagacccctcgcctcca  
caattttttatccctcttgacaat
